# Supplementary material for: A rotationally-driven polyethylene terephthalate microdevice with integrated reagent mixing for multiplexed PCR amplification of DNA
Source: Royal Society of Chemistry journal article supplement (doi:10.1039/c6ay01984f), 2016-01-01
Supplement: c6ay01984f1.pdf [file c6ay01984f1.pdf]

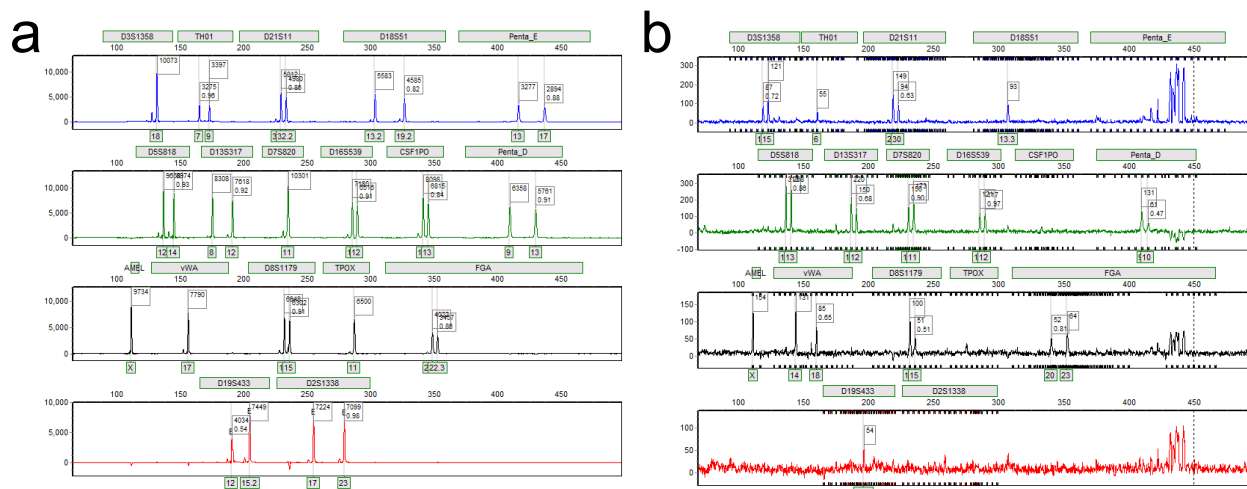

**Supporting Information Fig. 1** Exemplary profiles for PCR amplification of STR fragments. (a) Exemplary profile amplified conventionally in-tube. (b) Profile demonstrating a poor amplification.

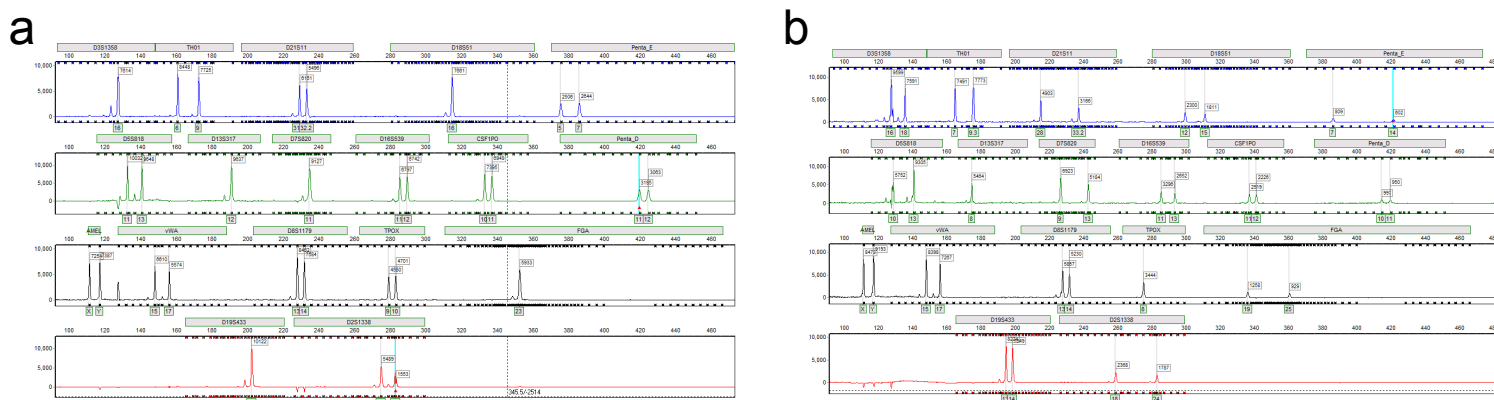

**Supporting Information Fig. 2** Integrated mixing and PCR on a PeT chip. (a-b) Enzymatically-derived (extracted on-chip) DNA from two different donors (same conditions as Fig. 4a-b).
